# Supplementary material
Source: publisher figshare collection journal article supplement (https://tandf.figshare.com/ndownloader/files/22017894)
Supplement: Supplementary file 1 [file 22017894]

## Supplementary Materials (Online)

**Figure S1. Recently developed rural roads in Ethiopia**

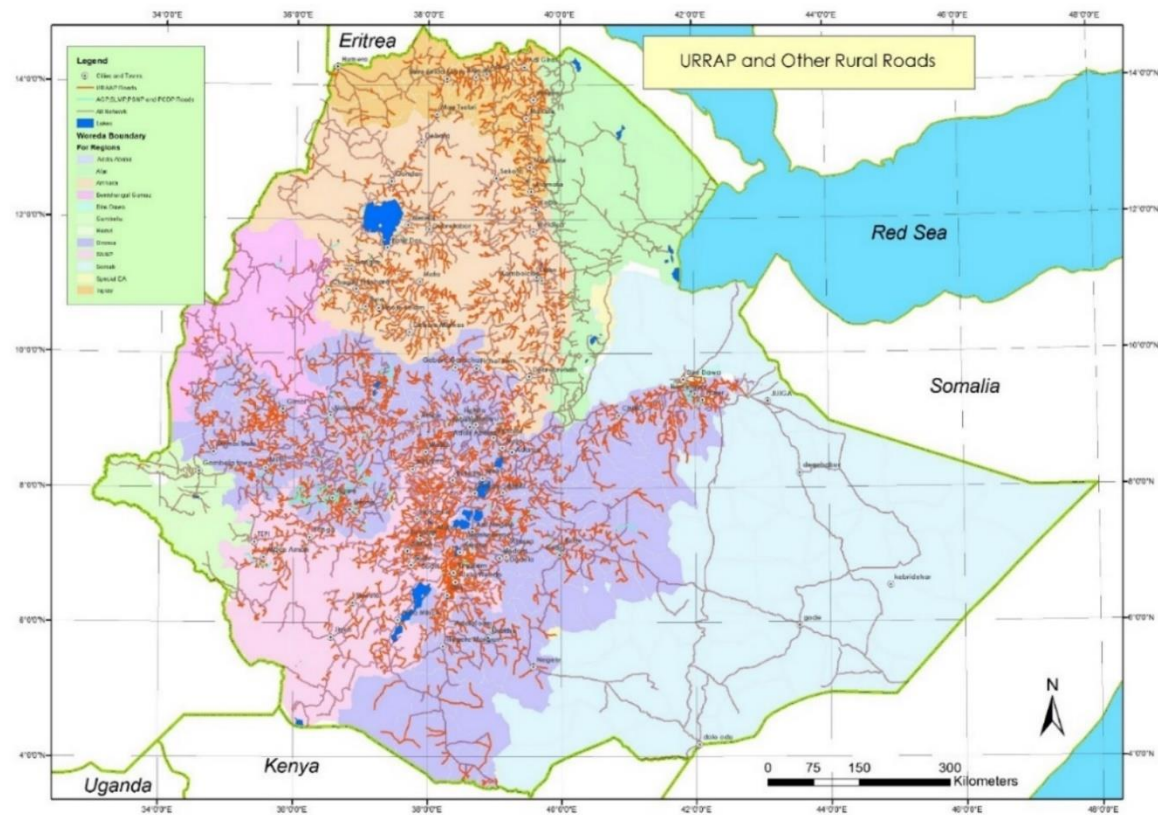

Source: The Ethiopia road database.

**Table S1. List of variables**

| Name                                       | Description                                                                                                                                                                                  | Data source                          |
|--------------------------------------------|----------------------------------------------------------------------------------------------------------------------------------------------------------------------------------------------|--------------------------------------|
| Consumption                                | Per adult-equivalent annual consumption in 2016 prices                                                                                                                                       | ESS                                  |
| Poor                                       | 1 if per adult-equivalent annual consumption is lower than Br. 4,360 (in 2016 prices); otherwise 0                                                                                           | ESS                                  |
| Food insecurity                            | 1 if the household experienced a situation in which they did not have food enough to feed the members during the last 12 months; otherwise 0                                                 | ESS                                  |
| Share of crop for sale                     | Share of harvested crop for sale                                                                                                                                                             | ESS                                  |
| Fertilizer use                             | 1 if the household used fertilizer during the season; otherwise 0                                                                                                                            | ESS                                  |
| Wage job                                   | 1 if any household member engaged in wage job during the last 12 months; otherwise 0                                                                                                         | ESS                                  |
| Rural road developed between 2010 and 2014 | 1 if any all-weather roads developed within the boundary of the community between 2010 and 2014; otherwise 0                                                                                 | The Ethiopia road database           |
| Length of rural road (Kebele/Woreda)       | Length of all-weather roads in the community/woreda                                                                                                                                          | The Ethiopia road database           |
| Travel time to town (Kebele)               | Travel time from the geometric center of the kebele to the nearest town (in minutes)                                                                                                         | The Ethiopia road database           |
| RAI (Woreda)                               | Share of population within 2km from any all-weather road in the kebele/woreda                                                                                                                | The Ethiopia road database, WorldPop |
| MAI (Kebele)                               | Sum of the population within 200 minutes from the Kebele center discounted by travel time                                                                                                    | The Ethiopia road database, WorldPop |
| Road density (Woreda)                      | Length of all-weather roads per population at the Woreda in which the household resides (kilometer per population)                                                                           | The Ethiopia road database, WorldPop |
| Number of adult equivalent                 | Number of adult equivalent in the household                                                                                                                                                  | ESS                                  |
| Age of household head                      | Age of the household head (in years)                                                                                                                                                         | ESS                                  |
| Female-headed household                    | 1 if the household head is female; otherwise 0                                                                                                                                               | ESS                                  |
| Education level of household head          | The highest level of education achieved by the household head: no education, incomplete primary, complete primary, incomplete secondary, complete secondary, post-secondary, adult education | ESS                                  |
| Marital status of household head           | Marital status of the household head: never married, married (monogamous), married (polygamous), divorced, separated, widowed                                                                | ESS                                  |
| Religion of household head                 | Religion of the household head: orthodox, catholic, protestant, Muslim, traditional, pagan, wakifata, other                                                                                  | ESS                                  |
| Drought (Kebele)                           | 1 if z-score of NDVI < 0; otherwise 0.                                                                                                                                                       | ESS                                  |
| Log of transfer received                   | Amount of transfer received by the household during the last 12 months (in 2016 prices)                                                                                                      | ESS                                  |
| PSNP assistance                            | 1 if the household received PSNP assistance during the last 12 months                                                                                                                        | ESS                                  |
| PSNP labor                                 | 1 if the household participated in PSNP labor activity during the last 12 months                                                                                                             | ESS                                  |
| Population density (Woreda)                | Population density in the woreda                                                                                                                                                             | Census                               |
| Poverty rate (Woreda)                      | Poverty headcount ratio at the woreda                                                                                                                                                        | HICES                                |
| No education (Kebele)                      | Share of adults with no education in the kebele                                                                                                                                              | Census                               |
| Share of public piped water (Kebele)       | Share of households with access to public piped water in the kebele                                                                                                                          | Census                               |
| Share of electricity (Kebele)              | Share of households with access to electricity for lighting in the kebele                                                                                                                    | Census                               |
| Agro-climate zone (Woreda)                 | Agro-ecological zones: tropic-warm/arid, tropic-warm/semiarid, tropic-warm/subhumid, tropic-cool/subhumid, tropic-cool/semiarid, tropic-cool/humid                                           | HarvestChoice/IFPRI                  |
| Region                                     | Region in which the household resides: SNNPR, Amhara; Oromia, Tigray, B/Gumuz, D/Dawa, Harar, Gambella, Afar                                                                                 | ESS                                  |

**Table S2. Estimation results on the log of household consumption**

|                                                                      | All<br>(1)        | Travel time threshold for <i>REMOTE</i> |                  |                     | z-score threshold for <i>DROUGHT</i> |                  |                   |
|----------------------------------------------------------------------|-------------------|-----------------------------------------|------------------|---------------------|--------------------------------------|------------------|-------------------|
|                                                                      |                   | >120 mins<br>(2)                        | >180 mins<br>(3) | >240 mins<br>(4)    | < 0<br>(5)                           | < 0.5<br>(6)     | < -1.0<br>(7)     |
| $\beta_5$ : <i>ROAD</i> $\times$ <i>POST</i>                         | 0.171*<br>(0.099) | 0.141<br>(0.106)                        | 0.162<br>(0.099) | 0.172*<br>(0.101)   | 0.076<br>(0.168)                     | 0.177<br>(0.130) | 0.132<br>(0.103)  |
| $\beta_7$ : <i>ROAD</i> $\times$ <i>REMOTE</i> $\times$ <i>POST</i>  |                   | 0.143<br>(0.206)                        | 0.126<br>(0.290) | 0.121<br>(0.145)    |                                      |                  |                   |
| $\beta_5 + \beta_7$ : Effects on HHs in remote communities           |                   | 0.280<br>(0.174)                        | 0.275<br>(0.235) | 0.293***<br>(0.054) |                                      |                  |                   |
| $\beta_7$ : <i>ROAD</i> $\times$ <i>DROUGHT</i> $\times$ <i>POST</i> |                   |                                         |                  |                     | 0.176<br>(0.201)                     | 0.003<br>(0.186) | 0.268<br>(0.252)  |
| $\beta_5 + \beta_7$ : Effects on HHs in drought communities          |                   |                                         |                  |                     | 0.252**<br>(0.107)                   | 0.180<br>(0.129) | 0.400*<br>(0.227) |

*Note:* The unit of observations is the matched sample of rural households in the 2012 and 2016 ESS. The DID models in Equations 2 and 3 were estimated with the natural logarithm of per adult equivalent household annual consumption as the outcome variables. The coefficient estimate for ( $\beta_5 + \beta_7$ ) indicates the association between rural road development and the outcome among households in remote communities or households in communities hit by the drought. Household characteristics are controlled (see Table S1 for the descriptions of the variables). Cluster robust standard errors in parentheses. \*, \*\*, and \*\*\* indicate significance level of estimated impacts at 10%, 5%, and 1% levels.

**Table S3. Summary of results on assistance**

|                                                         | PSNP<br>assistance<br>(1) | Free food<br>(2)  | PSNP or<br>free food<br>(3) |
|---------------------------------------------------------|---------------------------|-------------------|-----------------------------|
| (A) All households                                      | -0.049<br>(0.040)         | -0.037<br>(0.065) | -0.065<br>(0.089)           |
| <b>By travel time to town</b>                           |                           |                   |                             |
| (B) <i>REMOTE</i> = 1 (travel time $\geq$ 240 minutes)  | 0.134<br>(0.099)          | 0.093<br>(0.119)  | 0.216<br>(0.178)            |
| (C) <i>REMOTE</i> = 0 (travel time < 240 minutes)       | -0.063<br>(0.041)         | -0.047<br>(0.069) | -0.086<br>(0.094)           |
| <b>By drought exposure</b>                              |                           |                   |                             |
| (D) <i>DROUGHT</i> = 1 (vegetation z-score $\leq$ -1.0) | -0.049<br>(0.128)         | -0.061<br>(0.082) | -0.077<br>(0.184)           |
| (E) <i>DROUGHT</i> = 0 (vegetation z-score > -1.0)      | -0.034<br>(0.034)         | -0.020<br>(0.076) | -0.037<br>(0.096)           |

*Note:* The unit of observations is the matched sample of rural households in the 2012 and 2016 ESS. The DID models in Equations 2 and 3 were estimated with different outcome variables in the columns: whether the household received the PSNP assistance during the last year (column 1); whether the household received free food aid during the last year (column 2); and whether the household received either the PSNP assistance or food aid during the last year (column 3). The coefficient estimates for ( $\beta_5 + \beta_7$ ) are reported, which indicates the association between rural road development and the outcome among households in remote communities (row B) or households in communities hit by the drought (row D). Household characteristics are controlled (see Table S1 in the Supplementary Materials for the descriptions of the variables). Cluster robust standard errors in parentheses. \*, \*\*, and \*\*\* indicate significance level of estimated impacts at 10%, 5%, and 1% levels. Tables in the Supplementary Materials report detailed results.

**Table S4. Estimation results on agriculture**

|                                                                      |                  | Travel time threshold for <i>REMOTE</i> |                   |                     | z-score threshold for <i>DROUGHT</i> |                   |                    |
|----------------------------------------------------------------------|------------------|-----------------------------------------|-------------------|---------------------|--------------------------------------|-------------------|--------------------|
|                                                                      | All              | >120 mins                               | >180 mins         | >240 mins           | < 0                                  | < -0.5            | < -1.0             |
|                                                                      | (1)              | (2)                                     | (3)               | (4)                 | (5)                                  | (6)               | (7)                |
| <b>(A) Share of crop sold</b>                                        |                  |                                         |                   |                     |                                      |                   |                    |
| $\beta_5$ : <i>ROAD</i> $\times$ <i>POST</i>                         | 0.006<br>(0.022) | 0.002<br>(0.025)                        | -0.004<br>(0.023) | -0.006<br>(0.022)   | 0.026<br>(0.034)                     | 0.023<br>(0.031)  | 0.014<br>(0.025)   |
| $\beta_7$ : <i>ROAD</i> $\times$ <i>REMOTE</i> $\times$ <i>POST</i>  |                  | 0.008<br>(0.048)                        | 0.075<br>(0.062)  | 0.160***<br>(0.058) |                                      |                   |                    |
| $\beta_5$ + $\beta_7$ : Effects on HHs in remote communities         |                  | 0.011<br>(0.041)                        | 0.046<br>(0.055)  | 0.154***<br>(0.054) |                                      |                   |                    |
| $\beta_7$ : <i>ROAD</i> $\times$ <i>DROUGHT</i> $\times$ <i>POST</i> |                  |                                         |                   |                     | -0.042<br>(0.041)                    | -0.043<br>(0.041) | -0.060<br>(0.046)  |
| $\beta_5$ + $\beta_7$ : Effects on HHs in drought communities        |                  |                                         |                   |                     | -0.016<br>(0.025)                    | -0.020<br>(0.028) | -0.046<br>(0.039)  |
| <b>(B) Fertilizer use</b>                                            |                  |                                         |                   |                     |                                      |                   |                    |
| $\beta_5$ : <i>ROAD</i> $\times$ <i>POST</i>                         | 0.008<br>(0.036) | -0.002<br>(0.038)                       | -0.009<br>(0.035) | -0.019<br>(0.035)   | -0.001<br>(0.058)                    | 0.037<br>(0.051)  | -0.022<br>(0.066)  |
| $\beta_7$ : <i>ROAD</i> $\times$ <i>REMOTE</i> $\times$ <i>POST</i>  |                  | 0.051<br>(0.089)                        | 0.125<br>(0.143)  | 0.376***<br>(0.091) |                                      |                   |                    |
| $\beta_5$ + $\beta_7$ : Effects on HHs in remote communities         |                  | 0.048<br>(0.082)                        | 0.066<br>(0.131)  | 0.357***<br>(0.085) |                                      |                   |                    |
| $\beta_7$ : <i>ROAD</i> $\times$ <i>DROUGHT</i> $\times$ <i>POST</i> |                  |                                         |                   |                     | 0.015<br>(0.070)                     | -0.065<br>(0.074) | 0.173**<br>(0.079) |
| $\beta_5$ + $\beta_7$ : Effects on HHs in drought communities        |                  |                                         |                   |                     | 0.014<br>(0.042)                     | -0.028<br>(0.051) | 0.151**<br>(0.069) |

*Note:* The unit of observations is the matched sample of rural households in the 2012 and 2016 ESS. The DID models in Equations 2 and 3 were estimated with the share of crop sold by the household (A) and the binary indicator about the fertilizer use by the household (B) as the outcome variables. The coefficient estimate for ( $\beta_5 + \beta_7$ ) indicates the association between rural road development and the outcomes among households in remote communities or households in communities hit by the drought. Household characteristics are controlled (see Table S1 for the descriptions of the variables). Cluster robust standard errors in parentheses. \*, \*\*, and \*\*\* indicate significance level of estimated impacts at 10%, 5%, and 1% levels.

**Table S5. Estimation results on wage jobs**

|                                                                      |                    | Travel time threshold for <i>REMOTE</i> |                    |                    | z-score threshold for <i>DROUGHT</i> |                    |                    |
|----------------------------------------------------------------------|--------------------|-----------------------------------------|--------------------|--------------------|--------------------------------------|--------------------|--------------------|
|                                                                      | All<br>(1)         | >120 mins<br>(2)                        | >180 mins<br>(3)   | >240 mins<br>(4)   | < 0<br>(5)                           | < -0.5<br>(6)      | < -1.0<br>(7)      |
| <b>(A) All household members</b>                                     |                    |                                         |                    |                    |                                      |                    |                    |
| $\beta_5$ : <i>ROAD</i> $\times$ <i>POST</i>                         | 0.009<br>(0.016)   | 0.003<br>(0.019)                        | 0.008<br>(0.018)   | 0.008<br>(0.017)   | -0.022<br>(0.023)                    | -0.008<br>(0.019)  | -0.001<br>(0.018)  |
| $\beta_7$ : <i>ROAD</i> $\times$ <i>REMOTE</i> $\times$ <i>POST</i>  |                    | 0.023<br>(0.028)                        | 0.006<br>(0.037)   | 0.010<br>(0.058)   |                                      |                    |                    |
| $\beta_5 + \beta_7$ : Effects on HHs in remote communities           |                    | 0.025<br>(0.020)                        | 0.014<br>(0.029)   | 0.018<br>(0.054)   |                                      |                    |                    |
| $\beta_7$ : <i>ROAD</i> $\times$ <i>DROUGHT</i> $\times$ <i>POST</i> |                    |                                         |                    |                    | 0.042<br>(0.030)                     | 0.032<br>(0.034)   | 0.048<br>(0.029)   |
| $\beta_5 + \beta_7$ : Effects on HHs in drought communities          |                    |                                         |                    |                    | 0.020<br>(0.020)                     | 0.025<br>(0.029)   | 0.047**<br>(0.024) |
| <b>(B) Only female household members</b>                             |                    |                                         |                    |                    |                                      |                    |                    |
| $\beta_5$ : <i>ROAD</i> $\times$ <i>POST</i>                         | 0.006<br>(0.010)   | -0.001<br>(0.012)                       | 0.002<br>(0.011)   | 0.003<br>(0.010)   | -0.010<br>(0.015)                    | 0.000<br>(0.014)   | 0.007<br>(0.011)   |
| $\beta_7$ : <i>ROAD</i> $\times$ <i>REMOTE</i> $\times$ <i>POST</i>  |                    | 0.035**<br>(0.017)                      | 0.035*<br>(0.019)  | 0.045*<br>(0.027)  |                                      |                    |                    |
| $\beta_5 + \beta_7$ : Effects on HHs in remote communities           |                    | 0.033***<br>(0.011)                     | 0.035**<br>(0.015) | 0.048*<br>(0.025)  |                                      |                    |                    |
| $\beta_7$ : <i>ROAD</i> $\times$ <i>DROUGHT</i> $\times$ <i>POST</i> |                    |                                         |                    |                    | 0.023<br>(0.017)                     | 0.009<br>(0.021)   | -0.013<br>(0.016)  |
| $\beta_5 + \beta_7$ : Effects on HHs in drought communities          |                    |                                         |                    |                    | 0.012<br>(0.011)                     | 0.009<br>(0.016)   | -0.006<br>(0.012)  |
| <b>(C) Only young household members</b>                              |                    |                                         |                    |                    |                                      |                    |                    |
| $\beta_5$ : <i>ROAD</i> $\times$ <i>POST</i>                         | 0.046**<br>(0.023) | 0.038<br>(0.027)                        | 0.037<br>(0.024)   | 0.038<br>(0.023)   | 0.015<br>(0.041)                     | 0.027<br>(0.031)   | 0.031<br>(0.024)   |
| $\beta_7$ : <i>ROAD</i> $\times$ <i>REMOTE</i> $\times$ <i>POST</i>  |                    | 0.033<br>(0.042)                        | 0.065<br>(0.49)    | 0.104<br>(0.073)   |                                      |                    |                    |
| $\beta_5 + \beta_7$ : Effects on HHs in remote communities           |                    | 0.072**<br>(0.032)                      | 0.091**<br>(0.042) | 0.141**<br>(0.070) |                                      |                    |                    |
| $\beta_7$ : <i>ROAD</i> $\times$ <i>DROUGHT</i> $\times$ <i>POST</i> |                    |                                         |                    |                    | 0.046<br>(0.047)                     | 0.043<br>(0.042)   | 0.061<br>(0.054)   |
| $\beta_5 + \beta_7$ : Effects on HHs in drought communities          |                    |                                         |                    |                    | 0.061**<br>(0.025)                   | 0.070**<br>(0.032) | 0.092*<br>(0.049)  |

*Note:* The unit of observations is the matched sample of rural households in the ESS. The DID models in Equations 3 and 4 were estimated with the following outcome variables: (A) the share of household members who engaged in wage jobs (%), (B) the share of female household members who engaged in wage jobs (%), and (C) the share of young household members who engaged in wage jobs (%). The coefficient estimate for  $(\beta_5 + \beta_7)$  indicates the association between rural road development and the outcomes among households in remote communities or households in communities hit by the drought. Household characteristics are controlled (see Table S1 for the descriptions of the variables). Cluster robust standard errors in parentheses. \*, \*\*, and \*\*\* indicate significance level of estimated impacts at 10%, 5%, and 1% levels.
